# Supplementary material
Source: PubMed Central journal article supplement (PMC151473)
Supplement: plntcell_14_8_1903__1.pdf [file plntcell_14_8_1903__1.pdf]

**Web Table A.** Predicted genes in the 261-kb sequence contig spanning the Morex *Mla* locus.

| Predicted gene product | Position <sup>a</sup> | Strand | BLASTX Search           |         |                                                                   | Best EST BLASTN Match             |         |                    |
|------------------------|-----------------------|--------|-------------------------|---------|-------------------------------------------------------------------|-----------------------------------|---------|--------------------|
|                        |                       |        | Best homolog GenBank ID | E-value | Predicted function <sup>b</sup>                                   | GenBank ID (Species) <sup>c</sup> | E-value | Longest match (bp) |
| 711N16.16              | <476 ... 2898         | -      | AAC17615                | 5e-38   | unknown, similar to <i>Arabidopsis</i> hypothetical protein       |                                   |         |                    |
| 711N16.15              | 4045 ... 4466         | +      | CAA84230                | 6e-12   | extensin-like protein [ <i>Zea mays</i> ]                         |                                   |         |                    |
| 711N16.14              | 9073 ... 12450        | -      |                         |         | unknown                                                           |                                   |         |                    |
| BPM                    | 15373 ... 21468       | -      | AAK73144                | 1e-137  | putative pumilio/Mpt5 RNA-binding protein [ <i>Oryza sativa</i> ] | AW982507                          | 0       | 734                |
|                        |                       |        |                         |         |                                                                   | BG414539                          | 0       | 857                |
| BMTa                   | <22721 ... >22903     | -      | AAF164398               | 1e-15   | maturase [ <i>Bromus inermis</i> ]                                |                                   |         |                    |
| BMTb                   | <25299 ... >25490     | -      | AAF164384               | 7e-11   | maturase [ <i>Brachelytrum erectum</i> ]                          |                                   |         |                    |
| BDI                    | <29965 ... >30140     |        | AJ250665 (DNA only)     | 2e-38   | induced in barley by chemicals that activate disease resistance   | BF260884                          | 6e-42   | 176                |
|                        |                       |        |                         |         |                                                                   | BE420733                          | 1e-41   | 158                |
| 711N16.9               | 37785 ... 39765       | +      |                         |         | unknown                                                           |                                   |         |                    |

**Web Table A.** Predicted genes in the 261-kb sequence contig spanning the Morex *Mla* locus.

| Predicted gene product | Position <sup>a</sup> | Strand | BLASTX Search           |         |                                                                  | Best EST BLASTN Match                                        |         | Longest match (bp) |
|------------------------|-----------------------|--------|-------------------------|---------|------------------------------------------------------------------|--------------------------------------------------------------|---------|--------------------|
|                        |                       |        | Best homolog GenBank ID | E-value | Predicted function <sup>b</sup>                                  | GenBank ID (Species) <sup>c</sup>                            | E-value |                    |
| 711N16.8 <sup>d</sup>  | 49502 ... 53442       | -      | BAB64724                | 1e-65   | hypothetical protein<br>[ <i>Oryza sativa</i> ]                  | BF617740                                                     | 0       | 434                |
| RGH3b                  | 62862 ... 65673       | -      | AF149112                | 9e-45   | stripe rust resistance protein Yr10 [ <i>Triticum aestivum</i> ] | BF200008 [ <i>Triticum monococcum</i> ]                      | 1e-12   | 57                 |
| 80H14.15b              | 74225 ... 74797       | +      |                         |         | unknown                                                          |                                                              |         |                    |
| 80H14.14b              | 75570 ... 76794       | +      | T45059                  | 8e-5    | hypothetical protein<br>[ <i>Caenorhabditis elegans</i> ]        | BE196535                                                     | 2e-28   | 107                |
| RGH2b                  | 77666 ... 81459       | +      | AAK92576                | 5e-91   | putative disease resistance protein [ <i>Oryza sativa</i> ]      |                                                              |         |                    |
| RGH1f                  | 81517 ... 85549       | +      | CAC29241                | 0.0     | MLA6 protein                                                     | AV835011 [ <i>Hordeum vulgare</i> subsp. <i>spontaneum</i> ] | e-132   | 496                |
|                        |                       |        | AAG37354                | 0.0     | MLA1 protein<br>[ <i>Hordeum vulgare</i> ]                       |                                                              |         |                    |
| 80H14.11b              | 86562 ... 87614       | +      | T05774                  | 2e-5    | putative protein<br>[ <i>Arabidopsis thaliana</i> ]              | BE419259 [ <i>Triticum aestivum</i> ]                        | 3e-8    | 57                 |
| 80H14.10b              | 89999 ... 93163       |        |                         |         | unknown                                                          |                                                              |         |                    |

**Web Table A.** Predicted genes in the 261-kb sequence contig spanning the Morex *Mla* locus.

| Predicted gene product | Position <sup>a</sup> | Strand | BLASTX Search           |            |                                                                     | Best EST BLASTN Match                                        |         | Longest match (bp) |
|------------------------|-----------------------|--------|-------------------------|------------|---------------------------------------------------------------------|--------------------------------------------------------------|---------|--------------------|
|                        |                       |        | Best homolog GenBank ID | E-value    | Predicted function <sup>b</sup>                                     | GenBank ID (Species) <sup>c</sup>                            | E-value |                    |
| RGH3a                  | 102577 ...<br>105388  | -      | AF149112                | 9e-45      | stripe rust resistance protein Yr10<br>[ <i>Triticum aestivum</i> ] | BF200008<br>[ <i>Triticum monococcum</i> ]                   | 1e-12   | 57                 |
| 80H14.15a              | 113940 ...<br>114509  | +      |                         |            | unknown                                                             |                                                              |         |                    |
| 80H14.14a              | 115283 ...<br>116507  | +      | T45059                  | 8e-5       | hypothetical protein<br>[ <i>Caenorhabditis elegans</i> ]           | BE196535                                                     | 2e-28   | 107                |
| RGH2a                  | 117379 ...<br>121172  | +      | AAK92576                | 5e-91      | putative disease resistance protein [ <i>Oryza sativa</i> ]         |                                                              |         |                    |
| RGH1e                  | 121230 ...<br>125262  | +      | CAC29241<br>AAG37354    | 0.0<br>0.0 | MLA6 protein<br>MLA1 protein<br>[ <i>Hordeum vulgare</i> ]          | AV835011 [ <i>Hordeum vulgare</i> subsp. <i>spontaneum</i> ] | e-132   | 496                |
| 80H14.11a              | 126275 ...<br>127327  | +      | T05774                  | 2e-5       | putative protein<br>[ <i>Arabidopsis thaliana</i> ]                 | BE419259 [ <i>Triticum aestivum</i> ]                        | 3e-8    | 57                 |
| 80H14.10a              | 129712 ...<br>132873  | +      |                         |            | unknown                                                             |                                                              |         |                    |

**Web Table A.** Predicted genes in the 261-kb sequence contig spanning the Morex *Mla* locus.

| Predicted gene product | Position <sup>a</sup> | Strand | BLASTX Search           |         |                                                                | Best EST BLASTN Match                        |         | Longest match (bp) |
|------------------------|-----------------------|--------|-------------------------|---------|----------------------------------------------------------------|----------------------------------------------|---------|--------------------|
|                        |                       |        | Best homolog GenBank ID | E-value | Predicted function <sup>b</sup>                                | GenBank ID (Species) <sup>c</sup>            | E-value |                    |
| RGH1bcd                | 184898 ...            | -      | CAC29241                | 0.0     | MLA6 protein                                                   | AV835011 [ <i>Hordeum</i>                    | 0.0     | 514                |
|                        | 190492                |        | AAG37354                | 0.0     | MLA1 protein<br>[ <i>Hordeum vulgare</i> ]                     | <i>vulgare</i> subsp.<br><i>spontaneum</i> ] |         |                    |
| 80H14.8                | 194760 ...<br>197571  | +      |                         |         | unknown                                                        | BG344356                                     | 5e-89   | 341                |
| CI2f                   | 204440 ...            | +      | CAA40350                | 6e-39   | chymotrypsin inhibitor 2<br>[ <i>Hordeum vulgare</i> ]         | BE601601                                     | 1e-141  | 255                |
|                        | 204694                |        |                         |         |                                                                | BG366350                                     | 1e-141  | 255                |
|                        |                       |        |                         |         |                                                                |                                              |         |                    |
| CI2e                   | 206954 ...            | +      | CAB71340                | 2e-21   | putative proteinase<br>inhibitor<br>[ <i>Hordeum vulgare</i> ] | BE425944 [ <i>Triticum</i>                   | 7e-73   | 196                |
|                        | 207172                |        |                         |         |                                                                | <i>aestivum</i> ]                            |         |                    |

**Web Table A.** Predicted genes in the 261-kb sequence contig spanning the Morex *Mla* locus.

| Predicted gene product | Position <sup>a</sup> | Strand | BLASTX Search           |         |                                 | Best EST BLASTN Match                                        |                                         | Longest match (bp) |
|------------------------|-----------------------|--------|-------------------------|---------|---------------------------------|--------------------------------------------------------------|-----------------------------------------|--------------------|
|                        |                       |        | Best homolog GenBank ID | E-value | Predicted function <sup>b</sup> | GenBank ID (Species) <sup>c</sup>                            | E-value                                 |                    |
| RGH1a                  | 207917 ...            | +      | CAC29241                | 0.0     | MLA6 protein                    | BE587232 [ <i>Secale</i>                                     | 2e-86                                   | 373                |
|                        | 212228                |        | AAG37354                | 0.0     | MLA1 protein                    | <i>cereale</i> ]                                             |                                         |                    |
|                        |                       |        |                         |         |                                 | [ <i>Hordeum vulgare</i> ]                                   | BG606866 [ <i>Triticum monococcum</i> ] | 7e-80              |
|                        |                       |        |                         |         |                                 | AV835011 [ <i>Hordeum vulgare</i> subsp. <i>spontaneum</i> ] | 2e-77                                   | 442                |
| CI2d                   | 217540 ...            | -      | CAB71340                | 6e-26   | putative proteinase             | BG300496                                                     | 1e-123                                  | 225                |
|                        | 217764                |        |                         |         | inhibitor                       | BE231068                                                     | 1e-123                                  | 225                |
|                        |                       |        |                         |         |                                 | [ <i>Hordeum vulgare</i> ]                                   | BF257305                                | 1e-123             |
| CI2c                   | 220610 ...            | -      | CAB71340                | 5e-35   | putative proteinase             | BF255218                                                     | 1e-123                                  | 225                |
|                        | 220834                |        |                         |         | inhibitor                       | BF629382                                                     | 1e-123                                  | 225                |
|                        |                       |        |                         |         |                                 | [ <i>Hordeum vulgare</i> ]                                   | BF253985                                | 1e-123             |
| CI2b                   | 223775 ...            | -      | CAB71340                | 3e-24   | putative proteinase             | BG300496                                                     | 1e-80                                   | 201                |
|                        | 224008                |        |                         |         | inhibitor                       | BF257305                                                     | 1e-80                                   | 201                |
|                        |                       |        |                         |         |                                 | [ <i>Hordeum vulgare</i> ]                                   | BE231068                                | 1e-80              |

**Web Table A.** Predicted genes in the 261-kb sequence contig spanning the Morex *Mla* locus.

| Predicted gene product | Position <sup>a</sup> | Strand | BLASTX Search           |         |                                 | Best EST BLASTN Match             |         |                    |
|------------------------|-----------------------|--------|-------------------------|---------|---------------------------------|-----------------------------------|---------|--------------------|
|                        |                       |        | Best homolog GenBank ID | E-value | Predicted function <sup>b</sup> | GenBank ID (Species) <sup>c</sup> | E-value | Longest match (bp) |
| CI2a                   | 224982 ...            | -      | CAB71340                | 2e-11   | putative proteinase             | BF258541                          | 1e-42   | 109                |
|                        | 225149                |        |                         |         | inhibitor                       | BG300496                          | 1e-42   | 109                |
|                        |                       |        |                         |         | [ <i>Hordeum vulgare</i> ]      |                                   |         |                    |

<sup>a</sup>The carrots < > show the approximate sequence range.

<sup>b</sup>If the functional match is different from the best homolog, its GenBank accession number is given here.

<sup>c</sup>All GenBank EST matches originate from *Hordeum vulgare*, unless designated otherwise.

<sup>d</sup>The detection of ESTs for 711N16.8 only among monocots, but not in any dicot, may indicate that this is a grass-specific gene.
