# Supplementary material
Source: PubMed Central journal article supplement (PMC151473)
Supplement: plntcell_14_8_1903__2.pdf [file plntcell_14_8_1903__2.pdf]

**Web Table B.** Families of MITE elements in the barley *Mla* region

| MITE Element       | Position        | Size (bp) | MITE Element      | Position                           | Size (bp) |
|--------------------|-----------------|-----------|-------------------|------------------------------------|-----------|
| <i>Hormite1</i>    |                 |           | <i>Hormite4</i>   |                                    |           |
| <i>Hormite1.1</i>  | 29590 - 29746   | 157       | <i>Hormite4.1</i> | 55142 - 55249                      | 108       |
| <i>Hormite2</i>    |                 |           | <i>Hormite5</i>   |                                    |           |
| <i>Hormite2.1</i>  | 31684 - 32211   | 528       | <i>Hormite5.1</i> | 73203 - 73231                      | 29        |
| <i>Hormite3</i>    |                 |           | <i>Hormite5.2</i> |                                    |           |
| <i>Hormite3.1</i>  | 49087 - 49120   | 34        | <i>Hormite6</i>   |                                    |           |
| <i>Hormite3.2</i>  | 49126 - 49163   | 38        | <i>Hormite6.1</i> | 203605 - 203667                    | 63        |
| <i>Hormite3.3</i>  | 49203 - 49241   | 39        | <i>Hormite7</i>   |                                    |           |
| <i>Hormite3.4</i>  | 54772 - 54810   | 39        | <i>Hormite7.1</i> | 192191 - 192377                    | 187       |
| <i>Hormite3.5</i>  | 54815 - 54853   | 39        | <i>Stowaway</i>   |                                    |           |
| <i>Hormite3.6</i>  | 54856 - 54894   | 39        | <i>Stowaway.1</i> | 148 - 309                          | 162       |
| <i>Hormite3.7</i>  | 54932 - 54970   | 39        | <i>Stowaway.2</i> | 1592 - 1754                        | 163       |
| <i>Hormite3.8</i>  | 54974 - 55012   | 39        | <i>Stowaway.3</i> | 40068 - 40310                      | 243       |
| <i>Hormite3.9</i>  | 61214 - 61252   | 39        | <i>Stowaway.4</i> | 142691 - 142853                    | 163       |
| <i>Hormite3.10</i> | 61297 - 61335   | 39        | <i>Stowaway.5</i> | 136684 - 136726<br>143230 - 143342 | 158       |
| <i>Hormite3.11</i> | 61380 - 61418   | 39        | <i>Stowaway.6</i> | 217169 - 217348                    | 181       |
| <i>Hormite3.12</i> | 61460 - 61498   | 39        | <i>Stowaway.7</i> | 190752 - 190812<br>194398 - 194500 | 164       |
| <i>Hormite3.13</i> | 100929 - 100967 | 39        | <i>Stowaway.8</i> | 222790 - 222917                    | 128       |
| <i>Hormite3.14</i> | 101012 - 101050 | 39        |                   |                                    |           |
| <i>Hormite3.15</i> | 101095 - 101133 | 39        |                   |                                    |           |
| <i>Hormite3.16</i> | 101175 - 101213 | 39        |                   |                                    |           |
