# Supplementary material
Source: PubMed Central journal article supplement (PMC151473)
Supplement: plntcell_14_8_1903__3.pdf [file plntcell_14_8_1903__3.pdf]

**Web Table C.** Simple sequence repeats in the barley *Mla* region

| Sequence Name | Position |       | Length (bp) | Strand <sup>a</sup> | Repeat Name | Sequence environment             | Repeat Type <sup>b</sup> |
|---------------|----------|-------|-------------|---------------------|-------------|----------------------------------|--------------------------|
|               | Start    | End   |             |                     |             |                                  |                          |
| Morex_Mla     | 4290     | 4365  | 76          | +                   | (GGGGA)n    | mid <i>711N16.15</i>             | Simple_repeat            |
| Morex_Mla     | 4572     | 4592  | 21          | -                   | (GGAA)n     | Intergenic                       | Simple_repeat            |
| Morex_Mla     | 4715     | 4734  | 20          | +                   | (TAG)n      | Intergenic                       | Simple_repeat            |
| Morex_Mla     | 10155    | 10246 | 92          | -                   | (GAAAA)n    | mid <i>711N16.14</i>             | Simple_repeat            |
| Morex_Mla     | 12816    | 12904 | 89          | -                   | (TAAAA)n    | Intergenic                       | Simple_repeat            |
| Morex_Mla     | 13195    | 13223 | 29          | -                   | AT_rich     | Intergenic                       | Low_complexity           |
| Morex_Mla     | 21422    | 21505 | 84          | -                   | (CGG)n      | 5' <i>Bpm</i> (Intergenic)       | Simple_repeat            |
| Morex_Mla     | 21537    | 21567 | 31          | +                   | (CAAAC)n    | 5' <i>Bpm</i> (Intergenic)       | Simple_repeat            |
| Morex_Mla     | 29149    | 29170 | 22          | -                   | GC_rich     | Intergenic                       | Low_complexity           |
| Morex_Mla     | 35111    | 35203 | 93          | +                   | (CGG)n      | Intergenic                       | Simple_repeat            |
| Morex_Mla     | 35838    | 35858 | 21          | +                   | (CGA)n      | Intergenic                       | Simple_repeat            |
| Morex_Mla     | 41662    | 41755 | 94          | -                   | (GAAAA)n    | Intergenic                       | Simple_repeat            |
| Morex_Mla     | 41765    | 41793 | 29          | -                   | (TAAAAA)n   | Intergenic                       | Simple_repeat            |
| Morex_Mla     | 41839    | 42008 | 170         | -                   | (TAAAAA)n   | Intergenic                       | Simple_repeat            |
| Morex_Mla     | 41935    | 42041 | 107         | -                   | (GAAA)n     | Intergenic                       | Simple_repeat            |
| Morex_Mla     | 42601    | 42637 | 37          | -                   | AT_rich     | Intergenic                       | Low_complexity           |
| Morex_Mla     | 43972    | 44040 | 69          | -                   | (TAAA)n     | Intergenic                       | Simple_repeat            |
| Morex_Mla     | 45140    | 45309 | 170         | -                   | (CGGGGG)n   | Intergenic                       | Simple_repeat            |
| Morex_Mla     | 47534    | 47560 | 27          | -                   | (GA)n       | <i>SoloBare-1.2</i>              | Simple_repeat            |
| Morex_Mla     | 50194    | 50240 | 47          | -                   | (CA)n       | mid <i>711N16.8</i>              | Simple_repeat            |
| Morex_Mla     | 53934    | 54111 | 178         | -                   | (GAA)n      | Intergenic                       | Simple_repeat            |
| Morex_Mla     | 54382    | 54460 | 79          | -                   | (GAA)n      | Intergenic                       | Simple_repeat            |
| Morex_Mla     | 54505    | 54650 | 146         | +                   | (CGG)n      | Intergenic                       | Simple_repeat            |
| Morex_Mla     | 61081    | 61147 | 77          | +                   | (GAGAA)n    | Intergenic                       | Simple_repeat            |
| Morex_Mla     | 66106    | 66126 | 21          | -                   | (CGAGG)n    | 5' <i>RGH3b</i> (Intergenic)     | Simple_repeat            |
| Morex_Mla     | 66546    | 66619 | 74          | -                   | AT_rich     | Intergenic                       | Low_complexity           |
| Morex_Mla     | 66661    | 66689 | 29          | -                   | AT_rich     | Intergenic                       | Low_complexity           |
| Morex_Mla     | 66693    | 66759 | 67          | -                   | (CGA)n      | Intergenic                       | Simple_repeat            |
| Morex_Mla     | 69826    | 69870 | 45          | +                   | (GGA)n      | <i>Sukkula-1a</i>                | Simple_repeat            |
| Morex_Mla     | 74065    | 74086 | 22          | +                   | (CA)n       | 5' <i>80H14.15b</i> (Intergenic) | Simple_repeat            |

**Web Table C.** Simple sequence repeats in the barley *Mla* region

| Sequence Name | Position |        | Length (bp) | Strand <sup>a</sup> | Repeat Name | Sequence environment             | Repeat Type <sup>b</sup> |
|---------------|----------|--------|-------------|---------------------|-------------|----------------------------------|--------------------------|
|               | Start    | End    |             |                     |             |                                  |                          |
| Morex_Mla     | 75492    | 75516  | 25          | -                   | (GA)n       | 5' <i>80H14.14b</i> (Intergenic) | Simple_repeat            |
| Morex_Mla     | 76707    | 76782  | 76          | +                   | (GGA)n      | mid <i>80H14.14b</i>             | Simple_repeat            |
| Morex_Mla     | 86793    | 86833  | 41          | -                   | (AGGGGG)n   | mid <i>80H14.11b</i>             | Simple_repeat            |
| Morex_Mla     | 86894    | 87075  | 182         | +                   | (CCCCG)n    | mid <i>80H14.11b</i>             | Simple_repeat            |
| Morex_Mla     | 94902    | 94924  | 23          | -                   | GC_rich     | <i>HORGY-1</i>                   | Low_complexity           |
| Morex_Mla     | 97560    | 97639  | 80          | -                   | (GA)n       | <i>HORMU-1</i>                   | Simple_repeat            |
| Morex_Mla     | 98305    | 98366  | 62          | -                   | (TA)n       | <i>HORMU-1</i>                   | Simple_repeat            |
| Morex_Mla     | 100796   | 100862 | 67          | +                   | (GAGAA)n    | <i>HORMU-1</i> (intergenic)      | Simple_repeat            |
| Morex_Mla     | 105821   | 105841 | 21          | -                   | (CGAGG)n    | 5' <i>RGH3a</i> (intergenic)     | Simple_repeat            |
| Morex_Mla     | 106261   | 106334 | 74          | -                   | AT_rich     | intergenic                       | Low_complexity           |
| Morex_Mla     | 106376   | 106404 | 29          | -                   | AT_rich     | intergenic                       | Low_complexity           |
| Morex_Mla     | 106408   | 106474 | 67          | -                   | (CGA)n      | intergenic                       | Simple_repeat            |
| Morex_Mla     | 109541   | 109585 | 45          | +                   | (GGA)n      | <i>Sukkula-1b</i>                | Simple_repeat            |
| Morex_Mla     | 113780   | 113801 | 22          | +                   | (CA)n       | 5' <i>80H14.15a</i> (intergenic) | Simple_repeat            |
| Morex_Mla     | 115205   | 115229 | 25          | -                   | (GA)n       | 5' <i>80H14.14a</i> (intergenic) | Simple_repeat            |
| Morex_Mla     | 116420   | 116495 | 76          | +                   | (GGA)n      | mid <i>80H14.14a</i>             | Simple_repeat            |
| Morex_Mla     | 126506   | 126546 | 41          | -                   | (AGGGGG)n   | mid <i>80H14.11a</i>             | Simple_repeat            |
| Morex_Mla     | 126607   | 126788 | 182         | +                   | (CCCCG)n    | mid <i>80H14.11a</i>             | Simple_repeat            |
| Morex_Mla     | 134615   | 134637 | 23          | -                   | GC_rich     | <i>HORMU-1</i>                   | Low_complexity           |
| Morex_Mla     | 137274   | 137353 | 80          | -                   | (GA)n       | <i>HORMU-1</i>                   | Simple_repeat            |
| Morex_Mla     | 138019   | 138074 | 56          | -                   | (TA)n       | <i>HORMU-1</i>                   | Simple_repeat            |
| Morex_Mla     | 154282   | 154401 | 120         | +                   | (CGG)n      | <i>HORGY-1</i>                   | Simple_repeat            |
| Morex_Mla     | 155559   | 155585 | 27          | +                   | (G)n        | <i>HORGY-1</i>                   | Simple_repeat            |
| Morex_Mla     | 156478   | 156596 | 119         | +                   | (CGGGGG)n   | <i>HORGY-1</i>                   | Simple_repeat            |
| Morex_Mla     | 156662   | 156846 | 185         | +                   | (CGGGGG)n   | <i>HORGY-1</i>                   | Simple_repeat            |
| Morex_Mla     | 156748   | 156925 | 178         | -                   | (CACCC)n    | <i>HORGY-1</i>                   | Simple_repeat            |
| Morex_Mla     | 156893   | 157076 | 184         | +                   | (CGGGGG)n   | <i>HORGY-1</i>                   | Simple_repeat            |
| Morex_Mla     | 157499   | 157524 | 26          | -                   | AT_rich     | <i>HORGY-1</i>                   | Low_complexity           |
| Morex_Mla     | 157955   | 158014 | 60          | +                   | (CAGAG)n    | <i>HORGY-1</i>                   | Simple_repeat            |
| Morex_Mla     | 181488   | 181584 | 97          | -                   | (CGA)n      | <i>HORPIA-2</i>                  | Simple_repeat            |

**Web Table C.** Simple sequence repeats in the barley *Mla* region

| Sequence Name | Position |        | Length (bp) | Strand <sup>a</sup> | Repeat Name | Sequence environment | Repeat Type <sup>b</sup> |
|---------------|----------|--------|-------------|---------------------|-------------|----------------------|--------------------------|
|               | Start    | End    |             |                     |             |                      |                          |
| Morex_Mla     | 188509   | 188572 | 64          | +                   | (GAGAA)n    | mid <i>RGH1bcd</i>   | Simple_repeat            |
| Morex_Mla     | 192124   | 192155 | 32          | -                   | AT_rich     | <i>Alexandra</i>     | Low_complexity           |
| Morex_Mla     | 193878   | 193898 | 21          | -                   | (G)n        | <i>Alexandra</i>     | Simple_repeat            |
| Morex_Mla     | 195753   | 195782 | 30          | -                   | AT_rich     | mid <i>80H14.8</i>   | Low_complexity           |
| Morex_Mla     | 199811   | 199834 | 24          | -                   | AT_rich     | intergenic           | Low_complexity           |
| Morex_Mla     | 200835   | 200872 | 38          | -                   | AT_rich     | intergenic           | Low_complexity           |
| Morex_Mla     | 201097   | 201125 | 29          | -                   | AT_rich     | intergenic           | Low_complexity           |
| Morex_Mla     | 202516   | 202567 | 52          | -                   | AT_rich     | intergenic           | Low_complexity           |
| Morex_Mla     | 203458   | 203514 | 57          | -                   | AT_rich     | intergenic           | Low_complexity           |
| Morex_Mla     | 203559   | 203586 | 28          | -                   | AT_rich     | intergenic           | Low_complexity           |
| Morex_Mla     | 203712   | 203748 | 37          | -                   | AT_rich     | intergenic           | Low_complexity           |
| Morex_Mla     | 219736   | 219780 | 45          | -                   | AT_rich     | intergenic           | Low_complexity           |
| Morex_Mla     | 221418   | 221448 | 31          | -                   | AT_rich     | intergenic           | Low_complexity           |
| Morex_Mla     | 222677   | 222729 | 53          | -                   | AT_rich     | intergenic           | Low_complexity           |
| Morex_Mla     | 230915   | 230972 | 58          | -                   | (GAGAA)n    | <i>BARE-1c</i>       | Simple_repeat            |
| Morex_Mla     | 230933   | 230973 | 41          | -                   | (GAAAA)n    | <i>BARE-1c</i>       | Simple_repeat            |
| Morex_Mla     | 242584   | 242611 | 28          | -                   | AT_rich     | <i>BARE-1b</i>       | Low_complexity           |

<sup>a</sup> + plus strand, - minus strand.

<sup>b</sup> Among the 77 events, 20 are AT rich, 3 are GC rich, and 54 are SSR. Nineteen of the SSRs are associated with transposable elements (TE), including fourteen in LTR retroelements, and five in the *Mutator* transposon, while 35 SSRs are in the non-TE region. These non-TE SSRs include ten in gene coding regions and 25 in the intergenic regions. Twenty-two SSRs are present in the 40-kb duplication (six of these are associated with genes).
