# Supplementary material
Source: PubMed Central journal article supplement (PMC151473)
Supplement: plntcell_14_8_1903__4.pdf [file plntcell_14_8_1903__4.pdf]

**Web Table D.** Physical to genetic distance ratios in eight intervals spanning the *Mla* complex  
[updated from Wei et al. (1999) Genetics 153, 1929-1948]

| Interval                        | Physical distance | No. of recombinants | kb/crossover | kb/cM <sup>a</sup> | Prominent feature                                                |
|---------------------------------|-------------------|---------------------|--------------|--------------------|------------------------------------------------------------------|
| <i>RGH:b6-236 -&gt; Fr1062</i>  | ~250-kb           | 7                   | 36/1         | 1262               | Unknown low to middle-repetitive fraction                        |
| <i>Fr1062 -&gt; FW108</i>       | ~25-kb            | 5                   | 5/1          | 176                | Unknown low copy fraction                                        |
| <i>FW108 -&gt; 234L</i>         | < 30-kb           | 2                   | 15/1         | < 530              | Unknown low to middle-repetitive fraction                        |
| <i>234L -&gt; mwg2197</i>       | ~60-kb            | 1                   | 60/1         | 2120               | Unknown repetitive fraction                                      |
| <i>mwg2197 -&gt; 236R</i>       | ~120-kb           | 2                   | 60/1         | 2120               | Retrotransposon Complex II                                       |
| <i>236R -&gt; RGH3b</i>         | ~160-kb           | 0                   | 160/0        | > 5,653            | Genic ( <i>Mla</i> ) interspersed with retrotransposon Complex I |
| <i>RGH3b -&gt; 175D16-T7</i>    | ~35-kb            | 9                   | 4/1          | 141                | SSR rich, middle to high copy fraction                           |
| <i>175D16-T7-&gt; 296I20-T7</i> | ~115-kb           | 5                   | 23/1         | 813                | Genic                                                            |

<sup>a</sup>It was previously determined that the 8.1 cM *Hor1 -> Hor2* interval on chromosome 1HS had 286 crossovers out of 3,600 gametes in the C.I. 16151 x C.I. 16155 cross (DeScenzo *et al.* 1994 Mol. Pl. Microbe Inter. 7:657-666). The kb/cM ratio in this table is based on an average 0.0283 cM/crossover equivalent in the *Hor1* to *Hor2* interval.
